# Supplementary material for: The Potential Risk of Electronic Waste Disposal into Aquatic Media: The Case of Personal Computer Motherboards
Source: MDPI journal article supplement (doi:10.3390/toxics9070166), 2021-07-12
Supplement: s1 [file s1]

## Article

# Supplementary Materials: The Potential Risk of Electronic Waste Disposal into Aquatic Media: The Case of Personal Computer Motherboards

Georgios Kalamaras, Maria Kloukinioti, Maria Antonopoulou, Ioanna Ntaikou, Dimitris Vlastos, Antonios Eleftherianos and Stefanos Dailianis

**Table S1.** Agilent 8900 ICP-MS/MS parameters and operating conditions.

| Instrument parameter                           |        | Operating Condition        |                |                                        |
|------------------------------------------------|--------|----------------------------|----------------|----------------------------------------|
| RF applied power (W)                           |        | 1550                       |                |                                        |
| Sampling depth (mm)                            |        | 10                         |                |                                        |
| Sampling period (sec)                          |        | 0.31                       |                |                                        |
| Integration Time (sec)                         |        | 0.1                        |                |                                        |
| Plasma mode                                    |        | General Purpose            |                |                                        |
| Nebulizer gas flow rate (L min <sup>-1</sup> ) |        | 1.07                       |                |                                        |
| Auxiliary gas flow rate (L min <sup>-1</sup> ) |        | 0.90                       |                |                                        |
| Makeup gas flow rate (L min <sup>-1</sup> )    |        | 0.00                       |                |                                        |
| Plasma gas flow rate (L min <sup>-1</sup> )    |        | 15.0                       |                |                                        |
| Nebulizer                                      |        | Micromist glass nebulizer  |                |                                        |
| Nebulizer pump (rpm)                           |        | 0.1                        |                |                                        |
| Spray chamber                                  |        | Scott type-double pass     |                |                                        |
| Cell gas                                       | No gas | He (mL min <sup>-1</sup> ) | O <sub>2</sub> | H <sub>2</sub> (mL min <sup>-1</sup> ) |
| Gas flow rate (mL min <sup>-1</sup> )          | 0      | 4.3                        | 20%            | 7.0                                    |

**Table S2.** LOQs of the investigated elements.

| Mass | Element | LOQ (µg L <sup>-1</sup> ) | Mode                                                            | Internal Standard |
|------|---------|---------------------------|-----------------------------------------------------------------|-------------------|
| 27   | Al      | 10                        | No gas mode, Single quadrupole                                  | Sc                |
| 31   | P       | 0.2                       | O <sub>2</sub> mode 20%, mass shift 31--> 47, Triple quadrupole | -                 |
| 52   | Cr      | 0.2                       | He mode 4.3 mL min <sup>-1</sup> , Single quadrupole            | Sc                |
| 55   | Mn      | 0.2                       | He mode 4.3 mL min <sup>-1</sup> , Single quadrupole            | Sc                |
| 56   | Fe      | 10                        | H <sub>2</sub> mode 7ml/min, Triple quadrupole                  | Ge                |
| 60   | Ni      | 0.2                       | He mode, Single quadrupole                                      | Sc                |

|     |    |     |                                                                |    |
|-----|----|-----|----------------------------------------------------------------|----|
| 63  | Cu | 0.2 | He mode, Single quadrupole                                     | Ge |
| 66  | Zn | 10  | He mode, Single quadrupole                                     | Ge |
| 75  | As | 0.2 | O <sub>2</sub> mode 20%, mass shift 75-->91, Triple quadrupole | Rh |
| 78  | Se | 0.2 | H <sub>2</sub> mode 7 mL min <sup>-1</sup> , Triple quadrupole | Ge |
| 111 | Cd | 0.2 | He mode 4.3 mL min <sup>-1</sup> , Single quadrupole           | Rh |
| 118 | Sn | 0.2 | He mode 4.3 mL min <sup>-1</sup> , Single quadrupole           | Rh |
| 202 | Hg | 0.2 | He mode 4.3 mL min <sup>-1</sup> , Single quadrupole           | Tb |
| 208 | Pb | 0.2 | He mode 4.3 mL min <sup>-1</sup> , Single quadrupole           | Tb |

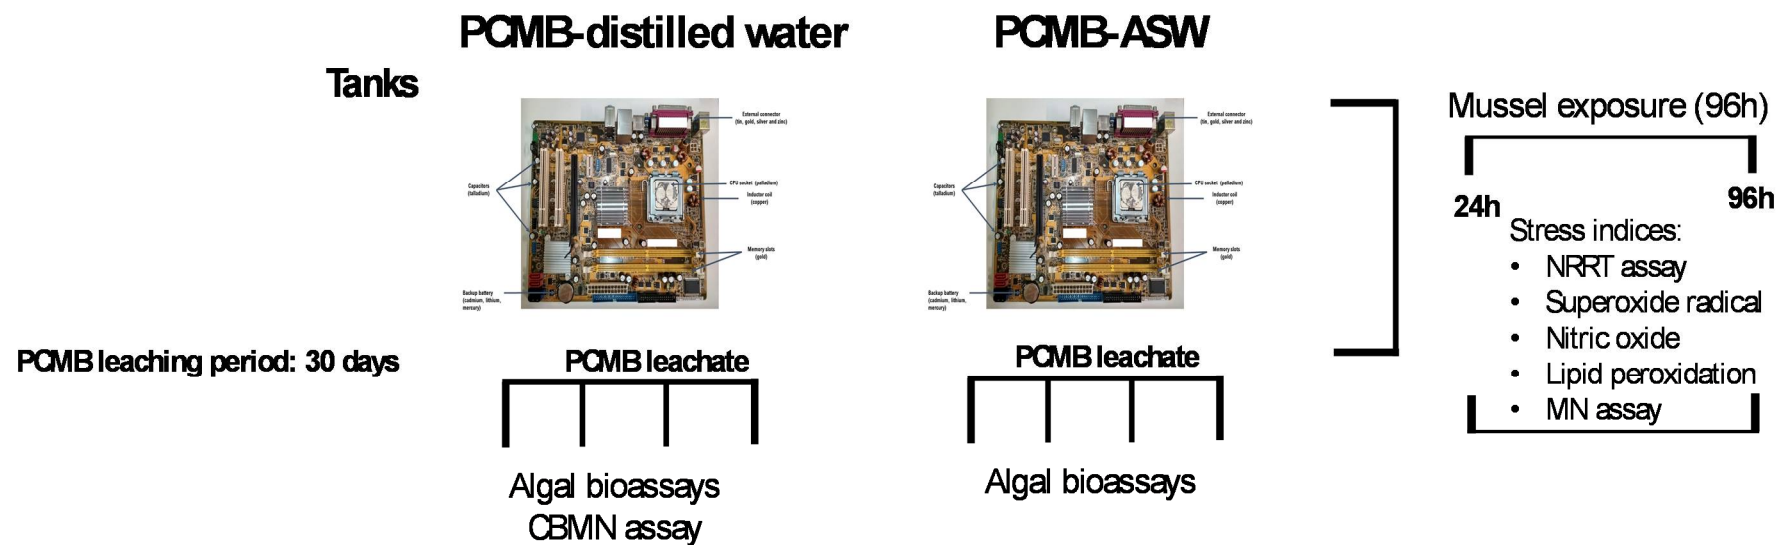

**Figure S1.** Experimental procedure for assessing the biological effects of PCMB leachates on fresh- and saltwater algal species, mussels, and human lymphocytes (in terms of CBMN assay).

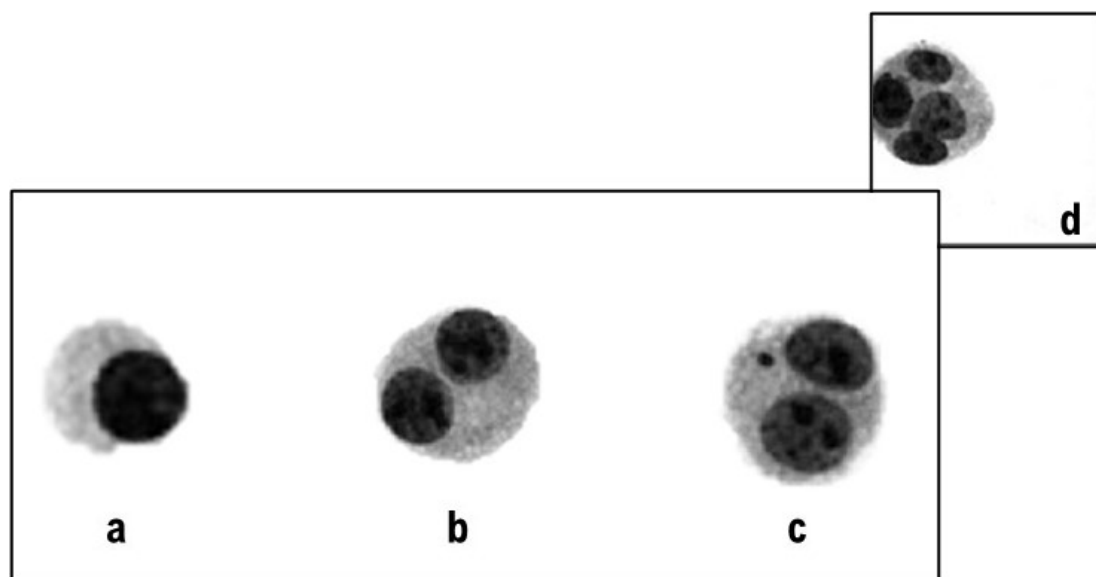

**Figure S2.** Representative pictures of human lymphocytes; (a) mononucleated cells, (b) binucleated cells, (c) binucleated cells with micronucleus, and (d) polynucleated cells (magnification 1000x).
